# Supplementary material
Source: PubMed Central journal article supplement (PMC4012391)
Supplement: NIHMS572846-supplement-01.pdf [file NIHMS572846-supplement-01.pdf]

## **Supporting Information**

# **Binding Free Energies for Nicotine Analogs Inhibiting Cytochrome P450 2A6 by a Combined Use of Molecular Dynamics Simulations and QM/MM-PBSA Calculations**

Haiting Lu,<sup>1,2,a</sup> Xiaoqin Huang,<sup>1,a</sup> Mohamed Diwan M. AbdulHameed,<sup>1</sup> and Chang-Guo Zhan<sup>1,\*</sup>

<sup>1</sup>*Department of Pharmaceutical Sciences, College of Pharmacy, University of Kentucky, 789 South Limestone Street, Lexington, Kentucky 40536 and* <sup>2</sup>*College of Chemistry and Chemical Engineering, Xinyang Normal University, Xinyang 464000, P. R. China*

**Running title:** CYP2A6-inhibitor Binding Free Energies

### **Correspondence:**

Chang-Guo Zhan, Ph.D.

Professor

Department of Pharmaceutical Sciences

College of Pharmacy

University of Kentucky

789 South Limestone Street

Lexington, KY 40536

TEL: 859-323-3943

E-mail: [zhan@uky.edu](mailto:zhan@uky.edu)

---

\* Corresponding author. E-mail: [zhan@uky.edu](mailto:zhan@uky.edu)

<sup>a</sup> These authors contributed equally to this work.

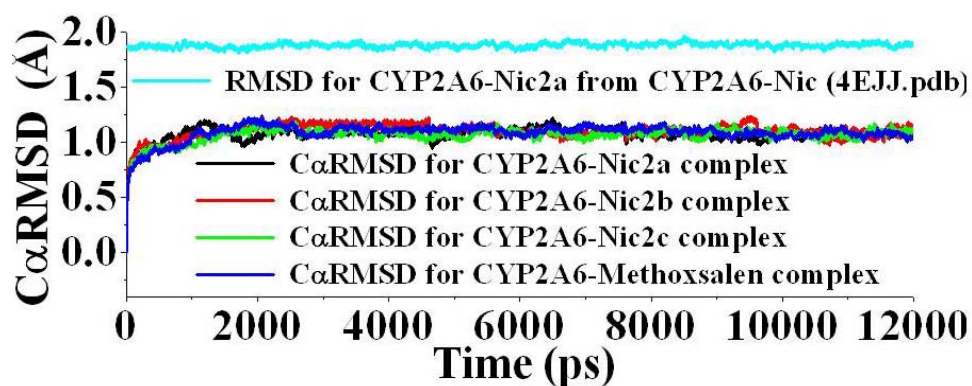

Figure S1. Tracked positional root-mean square deviation (RMSD) for  $C\alpha$  atoms of the binding structure of CYP2A6 binding with each of nicotine analogs along MD trajectories. The  $C\alpha$  RMSD was calculated based on the starting X-ray crystal structure (PDB entry code: 2FDW for CYP2A6-Nic2a complex, 2FDV for CYP2A6-Nic2b complex, 2FDU for CYP2A6-Nic2c complex). The positional RMSD for non-hydrogen atoms of CYP2A6-Nic2a complex was calculated based on the X-ray crystal structure of CYP2A6-Nicotine (PDB entry code: 4EJJ).

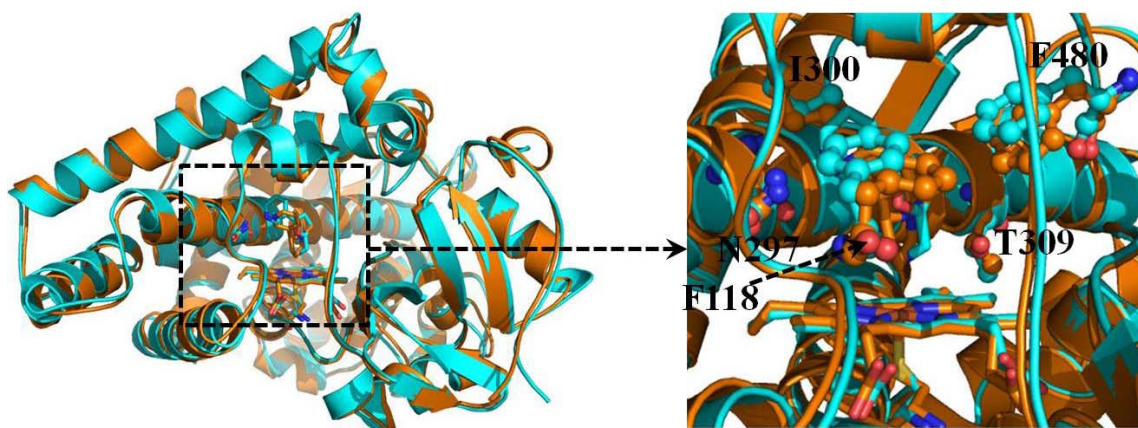

Figure S2. Superimposition of CYP2A6-Nic2a binding structure with the X-ray crystal structure of CYP2A6-Nicotine complex (PDB entry code: 4EJJ). The CYP2A6-Nic2a complex (colored in cyan) is the same as that in Figure 1 in the text, *i.e.* derived from MD trajectory and minimized using QM/MM approach. The proteins are represented as ribbons, with CYP2A6-Nicotine complex colored in gold. The heme group of CYP2A6 is shown in stick-style. Residues F118, N297, I300, T309 and F480 of CYP2A6, which are within the 5 Å of the ligand, are shown in ball-and-stick style. Both ligands (Nic2a and Nicotine) are shown in stick style and colored by atom-types.

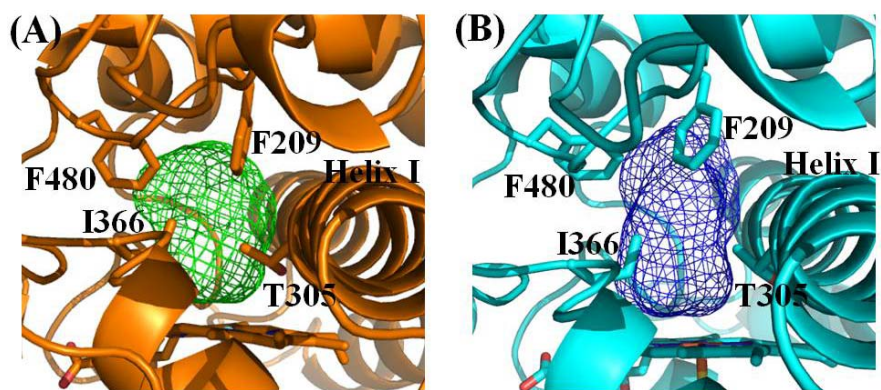

Figure S3. (A) The cavity around the Nicotine-binding site in CYP2A6-Nicotine (PDB entry code: 4EJJ). (B) The cavity around Nic2a-binding site in CYP2A6-Nic2a complex. CYP2A6 is represented as colored ribbon, and the cavity is represented as mesh surface calculated by using program HOLLOW.<sup>1</sup> The ligands (Nicotine and Nic2a) are not shown for the reason of clarity. The orientation of CYP2A6 is along the Helix I,  $\sim 180^\circ$  turn for residue F480 when compared with the position of F480 in Figure S2. Residues F209, T305, I366 and F480 are shown in stick-style and colored by atom types. As indicated in the X-ray crystal structures of CYP2A6 and CYP2A13,<sup>2</sup> the conformational change of residues F209, T305, I366 and F480 is recognized as the gating of the channel for ligands accessing to the binding site.

### CYP2A6-Nic2A complex

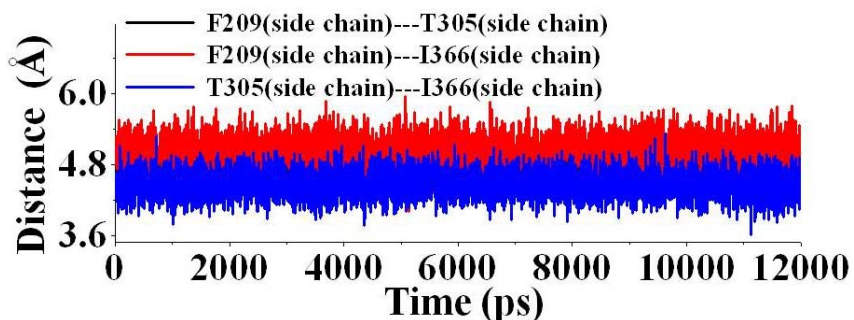

Figure S4. The tracked shortest distances for CYP2A6-Nic2A binding structure along the MD trajectories. F209(side chain)---T305(side chain) represents the shortest distance between non-hydrogen atoms at F209 side chain and the non-hydrogen atoms at T305 side chain; F209(side chain)---I366(side chain) represents the shortest distance between non-hydrogen atoms at F209 side chain and the non-hydrogen atoms at I366 side chain; and T305(side chain)---I366(side chain) represents the shortest distance between non-hydrogen atoms at T305 side chain and the non-hydrogen atoms at I366 side chain.

Table S1. Detailed energetic results (kcal/mol) obtained from the QM/MM-PBSA calculations at  $T = 298.15$  K and  $P = 1$  atm for the ten snapshots (No.1 to 10) of CYP2A6 complexed with Nic2a.

| No                       | $E_{\text{QM/MM(com)}}^a$<br>(Hartree) | $E_{\text{QM(lig)}}^b$<br>(Hartree) | $E_{\text{MM(rec)}}^c$<br>(kcal/mol) | $\Delta E_{\text{QM/MM}}^d$<br>(kcal/mol) | $\Delta G_{\text{solv}}$<br>(kcal/mol) | $\Delta E_{\text{bind}} \text{ or } \Delta H^e$<br>(kcal/mol) | $-T\Delta S (0.93)^f$<br>(kcal/mol) | $\Delta G_{\text{bind}}^g$<br>(kcal/mol) |
|--------------------------|----------------------------------------|-------------------------------------|--------------------------------------|-------------------------------------------|----------------------------------------|---------------------------------------------------------------|-------------------------------------|------------------------------------------|
| 1                        | -565.2844124                           | -571.7842825                        | 4134.60                              | -55.87                                    | 22.94                                  | -32.93                                                        | 22.33                               | -10.60                                   |
| 2                        | -565.4536488                           | -571.7842825                        | 4026.90                              | -54.36                                    | 23.20                                  | -31.16                                                        | 22.53                               | -8.63                                    |
| 3                        | -565.3879875                           | -571.7842825                        | 4068.00                              | -54.26                                    | 23.24                                  | -31.02                                                        | 24.90                               | -6.12                                    |
| 4                        | -565.25158                             | -571.7842825                        | 4155.00                              | -55.66                                    | 22.24                                  | -33.43                                                        | 24.08                               | -9.35                                    |
| 5                        | -565.3443749                           | -571.7842825                        | 4095.40                              | -54.29                                    | 22.87                                  | -31.42                                                        | 22.14                               | -9.29                                    |
| 6                        | -565.4685668                           | -571.7842825                        | 4017.90                              | -54.73                                    | 22.79                                  | -31.93                                                        | 23.62                               | -8.31                                    |
| 7                        | -565.5077392                           | -571.7842825                        | 3993.00                              | -54.41                                    | 23.63                                  | -30.78                                                        | 23.09                               | -7.68                                    |
| 8                        | -565.4607552                           | -571.7842825                        | 4023.30                              | -55.22                                    | 23.77                                  | -31.46                                                        | 21.58                               | -9.88                                    |
| 9                        | -565.6032297                           | -571.7842825                        | 3934.00                              | -55.33                                    | 22.97                                  | -32.36                                                        | 23.11                               | -9.25                                    |
| 10                       | -565.2777678                           | -571.7842825                        | 4137.70                              | -54.80                                    | 22.92                                  | -31.88                                                        | 24.42                               | -7.46                                    |
| <b>Ave.</b> <sup>h</sup> |                                        |                                     |                                      | <b>-54.89</b>                             | <b>23.06</b>                           | <b>-31.84</b>                                                 | <b>23.18</b>                        | <b>-8.66</b>                             |

<sup>a</sup>  $E_{\text{QM/MM(com)}}$  represents the energy of complex which is calculated at the B3LYP/6-31G(d):Amber level using the combined program of Gaussian03 and Amber8 software developed in our lab.<sup>1,2</sup>

<sup>b</sup>  $E_{\text{QM(lig)}}$  is the energy of ligand which is the most stable structure calculated at the B3LYP/6-31G(d) level in gas phase.

<sup>c</sup>  $E_{\text{MM(rec)}}$  represents the energy of MM subsystem calculated by Amber8 program.

<sup>d</sup> The QM/MM gas-phase binding energy.  $\Delta E_{\text{QM/MM}} = E_{\text{QM/MM(com)}} - E_{\text{MM(rec)}} - E_{\text{QM(lig)}}$ .

<sup>e</sup> The binding energy.  $\Delta E_{\text{bind}} = \Delta E_{\text{QM/MM}} + \Delta G_{\text{solv}}$ .

<sup>f</sup> The entropy contribution. The scaling factor  $w$  was 0.93 for the entropy calculations.

<sup>g</sup> The binding free energy.  $\Delta G_{\text{bind}} = \Delta E_{\text{QM/MM}} + \Delta G_{\text{solv}} - T\Delta S$ .

<sup>h</sup> The average values calculated for 10 snapshots.

Table S2. Detailed energetic results (kcal/mol) obtained from the QM/MM-PBSA calculations at  $T = 298.15$  K and  $P = 1$  atm for the ten snapshots (No.1 to 10) of CYP2A6 complexed with Nic2b.

| No                      | $E_{\text{QM/MM}}(\text{com})^a$<br>(Hartree) | $E_{\text{QM}}(\text{lig})^b$<br>(Hartree) | $E_{\text{MM}}(\text{rec})^c$<br>(kcal/mol) | $\Delta E_{\text{QM/MM}}^d$<br>(kcal/mol) | $\Delta G_{\text{solv}}$<br>(kcal/mol) | $\Delta E_{\text{bind}}$ or $\Delta H^e$<br>(kcal/mol) | $-T\Delta S (0.93)^f$<br>(kcal/mol) | $\Delta G_{\text{bind}}^g$<br>(kcal/mol) |
|-------------------------|-----------------------------------------------|--------------------------------------------|---------------------------------------------|-------------------------------------------|----------------------------------------|--------------------------------------------------------|-------------------------------------|------------------------------------------|
| 1                       | -604.5891176                                  | -611.0913628                               | 4135.70                                     | -55.48                                    | 25.84                                  | -29.63                                                 | 21.28                               | -8.35                                    |
| 2                       | -604.6484445                                  | -611.0913628                               | 4098.30                                     | -55.30                                    | 25.35                                  | -29.95                                                 | 22.33                               | -7.63                                    |
| 3                       | -604.5578043                                  | -611.0913628                               | 4154.50                                     | -54.63                                    | 26.65                                  | -27.98                                                 | 22.51                               | -5.46                                    |
| 4                       | -604.5788341                                  | -611.0913628                               | 4139.70                                     | -53.02                                    | 24.71                                  | -28.32                                                 | 22.07                               | -6.24                                    |
| 5                       | -604.3259586                                  | -611.0913628                               | 4297.30                                     | -51.94                                    | 25.33                                  | -26.61                                                 | 22.31                               | -4.30                                    |
| 6                       | -604.4627184                                  | -611.0913628                               | 4214.10                                     | -54.56                                    | 26.28                                  | -28.28                                                 | 23.07                               | -5.20                                    |
| 7                       | -604.5913711                                  | -611.0913628                               | 4131.00                                     | -52.19                                    | 24.77                                  | -27.42                                                 | 21.45                               | -5.98                                    |
| 8                       | -604.5449415                                  | -611.0913628                               | 4159.80                                     | -51.86                                    | 24.80                                  | -27.05                                                 | 22.32                               | -4.73                                    |
| 9                       | -604.4303878                                  | -611.0913628                               | 4233.70                                     | -53.87                                    | 25.49                                  | -28.39                                                 | 22.29                               | -6.10                                    |
| 10                      | -604.5900034                                  | -611.0913628                               | 4135.70                                     | -56.03                                    | 25.74                                  | -30.29                                                 | 21.45                               | -8.84                                    |
| <b>Ave.<sup>h</sup></b> |                                               |                                            |                                             | <b>-53.89</b>                             | <b>25.50</b>                           | <b>-28.39</b>                                          | <b>22.11</b>                        | <b>-6.28</b>                             |

<sup>a</sup>  $E_{\text{QM/MM}}(\text{com})$  represents the energy of complex which is calculated at the B3LYP/6-31G(d):Amber level.

<sup>b</sup>  $E_{\text{QM}}(\text{lig})$  is the energy of ligand which is the most stable structure calculated at the B3LYP/6-31G(d) level in the gas phase.

<sup>c</sup>  $E_{\text{MM}}(\text{rec})$  represents the energy of the MM subsystem calculated .

<sup>d</sup> The QM/MM gas-phase binding energy.  $\Delta E_{\text{QM/MM}} = E_{\text{QM/MM}}(\text{com}) - E_{\text{MM}}(\text{rec}) - E_{\text{QM}}(\text{lig})$ .

<sup>e</sup> The binding energy.  $\Delta E_{\text{bind}} = \Delta E_{\text{QM/MM}} + \Delta G_{\text{solv}}$ .

<sup>f</sup> The entropy contribution. The scaling factor  $w$  was 0.93 for the entropy calculations.

<sup>g</sup> The binding free energy.  $\Delta G_{\text{bind}} = \Delta E_{\text{QM/MM}} + \Delta G_{\text{solv}} - T\Delta S$ .

<sup>h</sup> The average values calculated for 10 snapshots.

Table S3. Detailed energetic results (kcal/mol) obtained from the QM/MM-PBSA calculations at  $T = 298.15$  K and  $P = 1$  atm for the ten snapshots (No.1 to 10) of CYP2A6 complexed with Nic2c.

| No                       | $E_{\text{QM/MM(com)}}^a$<br>(Hartree) | $E_{\text{QM(lig)}}^b$<br>(Hartree) | $E_{\text{MM(rec)}}^c$<br>(kcal/mol) | $\Delta E_{\text{QM/MM}}^d$<br>(kcal/mol) | $\Delta G_{\text{solv}}$<br>(kcal/mol) | $\Delta E_{\text{bind}}$ or $\Delta H^e$<br>(kcal/mol) | $-T\Delta S$ (0.93) <sup>f</sup><br>(kcal/mol) | $\Delta G_{\text{bind}}^g$<br>(kcal/mol) |
|--------------------------|----------------------------------------|-------------------------------------|--------------------------------------|-------------------------------------------|----------------------------------------|--------------------------------------------------------|------------------------------------------------|------------------------------------------|
| 1                        | -644.017397                            | -650.4014525                        | 4055.70                              | -49.64                                    | 23.00                                  | -26.64                                                 | 20.63                                          | -6.01                                    |
| 2                        | -643.8258067                           | -650.4014525                        | 4177.70                              | -51.42                                    | 24.83                                  | -26.59                                                 | 20.46                                          | -6.12                                    |
| 3                        | -644.1779389                           | -650.4014525                        | 3957.00                              | -51.68                                    | 24.16                                  | -27.52                                                 | 20.50                                          | -7.02                                    |
| 4                        | -644.0601322                           | -650.4014525                        | 4026.40                              | -47.16                                    | 22.50                                  | -24.65                                                 | 20.02                                          | -4.63                                    |
| 5                        | -643.8355732                           | -650.4014525                        | 4169.50                              | -49.35                                    | 23.30                                  | -26.05                                                 | 20.68                                          | -5.37                                    |
| 6                        | -643.8687773                           | -650.4014525                        | 4147.70                              | -48.38                                    | 24.55                                  | -23.83                                                 | 22.20                                          | -1.63                                    |
| 7                        | -644.0144532                           | -650.4014525                        | 4059.80                              | -51.89                                    | 25.00                                  | -26.90                                                 | 20.63                                          | -6.26                                    |
| 8                        | -644.2459105                           | -650.4014525                        | 3915.00                              | -52.34                                    | 24.66                                  | -27.67                                                 | 21.49                                          | -6.18                                    |
| 9                        | -644.182057                            | -650.4014525                        | 3952.70                              | -49.97                                    | 24.30                                  | -25.67                                                 | 18.79                                          | -6.88                                    |
| 10                       | -643.9320033                           | -650.4014525                        | 4108.00                              | -48.36                                    | 23.46                                  | -24.90                                                 | 18.86                                          | -6.03                                    |
| <b>Ave.</b> <sup>h</sup> |                                        |                                     |                                      | <b>-50.02</b>                             | <b>23.98</b>                           | <b>-26.04</b>                                          | <b>20.43</b>                                   | <b>-5.61</b>                             |

<sup>a</sup>  $E_{\text{QM/MM(com)}}$  represents the energy of complex which is calculated at the B3LYP/6-31G(d):Amber level.

<sup>b</sup>  $E_{\text{QM(lig)}}$  is the energy of ligand which is the most stable structure calculated at the B3LYP/6-31G(d) level in the gas phase.

<sup>c</sup>  $E_{\text{MM(rec)}}$  represents the energy of MM subsystem calculated .

<sup>d</sup> The QM/MM gas-phase binding energy.  $\Delta E_{\text{QM/MM}} = E_{\text{QM/MM(com)}} - E_{\text{MM(rec)}} - E_{\text{QM(lig)}}$ .

<sup>e</sup> The binding energy.  $\Delta E_{\text{bind}} = \Delta E_{\text{QM/MM}} + \Delta G_{\text{solv}}$ .

<sup>f</sup> The entropy contribution. The scaling factor  $w$  was 0.93 for the entropy calculations.

<sup>g</sup> The binding free energy.  $\Delta G_{\text{bind}} = \Delta E_{\text{QM/MM}} + \Delta G_{\text{solv}} - T\Delta S$ .

<sup>h</sup> The average values calculated for 10 snapshots.

Table S4. Detailed energetic results (kcal/mol) obtained from the QM/MM-PBSA calculations at  $T = 298.15$  K and  $P = 1$  atm for the ten snapshots (No.1 to 10) of CYP2A6 complexed with Methoxsalen.

| No                       | $E_{\text{QM/MM(com)}}^a$<br>(Hartree) | $E_{\text{QM(lig)}}^b$<br>(Hartree) | $E_{\text{MM(rec)}}^c$<br>(kcal/mol) | $\Delta E_{\text{QM/MM}}^d$<br>(kcal/mol) | $\Delta G_{\text{solv}}$<br>(kcal/mol) | $\Delta E_{\text{bind}}$ or $\Delta H^e$<br>(kcal/mol) | $-T\Delta S$ (0.93) <sup>f</sup><br>(kcal/mol) | $\Delta G_{\text{bind}}^g$<br>(kcal/mol) |
|--------------------------|----------------------------------------|-------------------------------------|--------------------------------------|-------------------------------------------|----------------------------------------|--------------------------------------------------------|------------------------------------------------|------------------------------------------|
| 1                        | -756.3811177                           | -762.9582147                        | 4179.70                              | -52.51                                    | 26.51                                  | -26.00                                                 | 19.17                                          | -6.83                                    |
| 2                        | -756.3065483                           | -762.9582147                        | 4228.40                              | -54.41                                    | 26.81                                  | -27.60                                                 | 20.27                                          | -7.33                                    |
| 3                        | -756.3631751                           | -762.9582147                        | 4193.70                              | -55.25                                    | 27.74                                  | -27.51                                                 | 20.05                                          | -7.46                                    |
| 4                        | -756.4086644                           | -762.9582147                        | 4164.80                              | -54.89                                    | 27.08                                  | -27.81                                                 | 18.14                                          | -9.67                                    |
| 5                        | -756.5171634                           | -762.9582147                        | 4096.80                              | -54.98                                    | 28.04                                  | -26.94                                                 | 18.26                                          | -8.68                                    |
| 6                        | -756.4214671                           | -762.9582147                        | 4157.00                              | -55.13                                    | 27.13                                  | -28.00                                                 | 19.97                                          | -8.02                                    |
| 7                        | -756.4366903                           | -762.9582147                        | 4147.40                              | -55.08                                    | 27.60                                  | -27.48                                                 | 18.09                                          | -9.40                                    |
| 8                        | -756.3556229                           | -762.9582147                        | 4199.00                              | -55.81                                    | 27.78                                  | -28.03                                                 | 19.23                                          | -8.80                                    |
| 9                        | -756.4381811                           | -762.9582147                        | 4145.70                              | -54.31                                    | 26.72                                  | -27.59                                                 | 21.02                                          | -6.57                                    |
| 10                       | -756.5856228                           | -762.9582147                        | 4051.70                              | -52.83                                    | 26.81                                  | -26.02                                                 | 20.17                                          | -5.85                                    |
| <b>Ave.</b> <sup>h</sup> |                                        |                                     |                                      | <b>-54.52</b>                             | <b>27.22</b>                           | <b>-27.30</b>                                          | <b>19.44</b>                                   | <b>-7.86</b>                             |

<sup>a</sup>  $E_{\text{QM/MM(com)}}$  represents the energy of complex which is calculated at the B3LYP/6-31G(d):Amber level.

<sup>b</sup>  $E_{\text{QM(lig)}}$  is the energy of ligand which is the most stable structure calculated at the B3LYP/6-31G(d) level in the gas phase.

<sup>c</sup>  $E_{\text{MM(rec)}}$  represents the energy of MM subsystem calculated.

<sup>d</sup> The QM/MM gas-phase binding energy.  $\Delta E_{\text{QM/MM}} = E_{\text{QM/MM(com)}} - E_{\text{MM(rec)}} - E_{\text{QM(lig)}}$ .

<sup>e</sup> The binding energy.  $\Delta E_{\text{bind}} = \Delta E_{\text{QM/MM}} + \Delta G_{\text{solv}}$ .

<sup>f</sup> The entropy contribution. The scaling factor  $w$  was 0.93 for the entropy calculations.

<sup>g</sup> The binding free energy.  $\Delta G_{\text{bind}} = \Delta E_{\text{QM/MM}} + \Delta G_{\text{solv}} - T\Delta S$ .

<sup>h</sup> The average values calculated for 10 snapshots

Table S5. Calculated binding free energies (kcal/mol, with standard deviations) for CYP2A6 binding with inhibitors by using the MM-PBSA method in comparison with the experimentally-derived binding free energies.

|             | $\Delta E_{\text{MM}}$ | $\Delta G_{\text{solv}}$ | $\Delta E_{\text{bind}}$ | $-T\Delta S$                    | $\Delta G_{\text{bind}}^{\text{calc}}$ | $\Delta G_{\text{bind}}^{\text{expt } a}$ |
|-------------|------------------------|--------------------------|--------------------------|---------------------------------|----------------------------------------|-------------------------------------------|
| Nic2a       | -47.3±2.0              | 26.8±1.2                 | -20.5±2.0                | 10.8±0.7<br>(12.7) <sup>b</sup> | -9.7±1.3<br>(-7.8) <sup>b</sup>        | -8.5                                      |
| Nic2b       | -48.0±2.3              | 30.9±1.4                 | -17.1±2.3                | 9.6±1.1<br>(11.3) <sup>b</sup>  | -7.5±2.1<br>(-5.8) <sup>b</sup>        | -7.2                                      |
| Nic2c       | -45.3±2.2              | 27.7±1.4                 | -17.6±2.1                | 8.6±0.7<br>(10.2) <sup>b</sup>  | -9.0±1.4<br>(-7.5) <sup>b</sup>        | -5.5                                      |
| Methoxsalen | -49.4±2.0              | 31.3±1.0                 | -18.1±1.9                | 8.2±1.1<br>(9.7) <sup>b</sup>   | -9.9±0.7<br>(-8.4) <sup>b</sup>        | -7.8                                      |

<sup>a</sup> The experimental binding free energies were calculated from the corresponding experimental  $K_i$  values *via*  $\Delta G_{\text{bind}}^{\text{expt}} = RT \ln K_d = RT \ln K_i$ . The binding free energies as listed in Table S5 were calculated by using the molecular mechanics-Poisson-Boltzmann surface area (MM-PBSA) method.<sup>3</sup> The procedure for the MM-PBSA calculations is similar to that used in our previous studies,<sup>4,5</sup> and is also similar to the QM/MM-PBSA methods described in the text of the present paper (with  $w=0.93$ ). The final binding free energy  $\Delta G_{\text{bind}}$  for CYP2A6 inhibitor each inhibitor was taken as the average of the  $\Delta G_{\text{bind}}$  values calculated for the equally-distributed 100 snapshots of the last 9.0 ns MD trajectory.

<sup>b</sup> The values in parentheses were obtained by re-calibrating the  $w$  based on the MM-PBSA data.

## References

- <sup>1</sup> B. K. Ho, F. Gruswitz, *BMC Struct. Biol.* **2008**, *8*, 49.
- <sup>2</sup> N. M. DeVore, E. E. Scott, *J. Biol. Chem.* **2012**, *287*(32), 26576.
- <sup>3</sup> P. A. Kollman, I. Massova, C. Reyes, B. Kuhn, S. Huo, L. Chong, M. Lee, T. Lee, Y. Duan, W. Wang, O. Donini, P. Cieplak, J. Srinivasan, D. A. Case, T. E. Cheatham. *Acc. Chem. Res.* **2000**, *33*, 889.
- <sup>4</sup> D. Li, X. Huang, K. Han, C.-G. Zhan. *J. Am. Chem. Soc.* **2011**, *133*(19), 7416.
- <sup>5</sup> X. Huang, H.-H. Gu, C.-G. Zhan. *J. Phys. Chem. B* **2009**, *113*, 15057.
